# Supplementary material
Source: publisher figshare collection journal article supplement (https://karger.figshare.com/ndownloader/files/30725891)
Supplement: Supplementary file 1 [file 30725891]

**Supplementary Table 1.** Baseline characteristics according to the baseline body weights

| Variables | All groups (n=160) | | | No-titration group only (n=54) | | |
| --- | --- | --- | --- | --- | --- | --- |
| Low BW (<55kg) (n=63) | High BW (≥55kg) (n=97) | *P* | Low BW (<55kg) (n=22) | High BW (≥55kg) (n=32) | *P* |
| Age, yr | 77.1±8.0 | 74.1±8.9 | 0.038 | 77.3±7.5 | 74.9±8.6 | 0.298 |
| Gender, female (%) | 51/63, 81% | 47/97, 48.5% | <0.001 | 18/22 (81.8%) | 16/32 (50.0%) | 0.017 |
| Group (Titration/no-titration) | 41/22 | 65/32 | 0.963 | 0/22 | 0/32 | n/a |
| Education (low/mid/high, n) | 39/15/9 | 45/26/26 | 0.099 | 15/4/3 | 13/12/7 | 0.133 |
| Baseline K-MMSE | 13.1±5.0 | 14.0±4.6 | 0.238 | 13.4±6.0 | 15.2±3.5 | 0.215 |
| Baseline CDR | 1.7±0.7 | 1.6±0.6 | 0.664 | 1.8±0.6 | 1.6±0.5 | 0.200 |
| Baseline GDS | 4.9±0.6 | 4.8±0.7 | 0.367 | 5.0±0.6 | 4.8±0.8 | 0.582 |
| Baseline weight, kg | 48.3±4.6 | 64.6±7.0 | <0.001 | 48.1±5.4 | 63.9±6.5 | <0.001 |
| Baseline BMI, kg/ | 21.5±2.1 | 25.4±2.8 | <0.001 | 21.1±2.4 | 25.4±2.2 | <0.001 |
| Donepezil duration(month) | 23.1±24.8 | 22.7±25.0 | 0.920 | 23.4±24.6 | 24.7±26.5 | 0.853 |

K-MMSE, Korean version of Mini-Mental State Examination; CDR, Clinical dementia rating; GDS, General deterioration scale; BMI, Body mass index; BW, body weight.

**Supplementary Table 2.** Adverse events according to the baseline body weights (no-titration group)

| Variable | Male (n=20) | | | Female (n=34) | | |
| --- | --- | --- | --- | --- | --- | --- |
| Q1 (n=5) | Q2~4 (n=15) | *P* | T1~2 (n=26) | T3 (n=8) | *P* |
| Age, yr | 83.0±5.0 | 74.6±9.6 | 0.105 | 75.6±7.9 | 75.3±6.8 | 0.352 |
| Education (low/mid/high, n) | 1/1/3 | 3/8/4 | 0.442 | 20/3/3 | 4/4/0 | 0.058 |
| Baseline K-MMSE | 13.8±7.9 | 14.4±4.1 | 0.782 | 14.0±4.9 | 16.1±2.9 | 0.333 |
| Baseline CDR | 1.7±0.6 | 1.7±0.5 | 1.000 | 1.7±0.6 | 1.6±0.5 | 1.000 |
| Baseline GDS | 4.8±1.0 | 4.9±0.9 | 0.747 | 4.9±0.6 | 4.8±0.7 | 0.426 |
| Donepezil duration (month) | 15.5±18.7 | 24.0±24.9 | 0.497 | 27.6±27.7 | 18.5±24.6 | 0.485 |
| AESI (n, %) | 3, 60.0% | 4, 26.7% | 0.290 | 18, 69.2% | 0, 0% | 0.001 |

K-MMSE, Korean version of Mini-Mental State Examination; CDR, Clinical dementia rating; GDS, General deterioration scale; AESI, Adverse events of special interest.

Male: Q1 (lower 25 %) ≤58 kg, 58 kg < Q2 ≤ 65 kg, 65 kg < Q3 ≤ 69 kg, 69 kg < Q4.

Female: T1 (lower 33 %) ≤ 50 kg, 50 kg < T2 ≤57 kg, 57kg < T3.
